# Supplementary material for: Complete Plastid and Mitochondrial Genomes of Aeginetia indica Reveal Intracellular Gene Transfer (IGT), Horizontal Gene Transfer (HGT), and Cytoplasmic Male Sterility (CMS)
Source: MDPI journal article supplement (doi:10.3390/ijms22116143), 2021-06-07
Supplement: s1 [file s1]

**Table S1.** Source for plastid genomes included this study

| Class    | Order     | Family           | Species                                          | Accession number |
|----------|-----------|------------------|--------------------------------------------------|------------------|
| Asterids | Solanales | Solanaceae       | <i>Solanum lycopersicum</i>                      | AC_000188        |
|          | Lamiales  | Scrophulariaceae | <i>Scrophularia takesimensis</i>                 | KM590983         |
|          |           | Lamiaceae        | <i>Salvia miltorhiza</i>                         | NC_023209        |
|          |           | Palowniaceae     | <i>Paulownia coreana</i>                         | NC_031435        |
|          |           | Orobanchaceae    | <i>Triaenophora shennongjiaensis</i>             | NC_039781        |
|          |           |                  | <i>Rehmannia glutinosa</i>                       | NC_034308        |
|          |           |                  | <i>Rehmannia elata</i>                           | NC_034312        |
|          |           |                  | <i>Rehmannia chingii</i>                         | NC_033534        |
|          |           |                  | <i>Lindenbergia phillippensis</i>                | NC_022859        |
|          |           |                  | <i>Aeginetia indica</i>                          | MN529629         |
|          |           |                  | <b><i>Aeginetia indica</i> (This study)</b>      | <b>MW851293</b>  |
|          |           |                  | <i>Lathraea squamaria</i>                        | NC_027838        |
|          |           |                  | <i>Brandisia swinglei</i>                        | NC_042954        |
|          |           |                  | <i>Castilleja paramensis</i>                     | NC_031806        |
|          |           |                  | <i>Pedicularis cheilanthifolia</i>               | NC_036010        |
|          |           |                  | <i>Pedicularis hallaisanensis</i>                | NC_037433        |
|          |           |                  | <i>Pedicularis ishidoyana</i>                    | NC_029700        |
|          |           |                  | <i>Schwalbea americana</i>                       | NC_023115        |
|          |           |                  | <i>Cistanche phelypaea</i>                       | NC_025642        |
|          |           |                  | <i>Cistanche deserticola</i>                     | NC_021111        |
|          |           |                  | <i>Epifagus virginiana</i>                       | NC_001568        |
|          |           |                  | <i>Conopholis americana</i>                      | NC_023131        |
|          |           |                  | <i>Phelipanche purpurea</i>                      | NC_023132        |
|          |           |                  | <i>Orobanche californica</i>                     | NC_025651        |
|          |           |                  | <i>Aphyllon epigalium</i> subsp <i>epigalium</i> | MH050785         |
|          |           |                  | <i>Aphyllon fasciculatum</i>                     | NC_039679        |
|          |           |                  | <i>Boulardia latisquama</i>                      | NC_025641        |
|          |           |                  | <i>Orobanche rapum-genistae</i>                  | NC_031444        |
|          |           |                  | <i>Orobanche panicii</i>                         | NC_031443        |
|          |           |                  | <i>Orobanche crenata</i>                         | NC_024845        |
|          |           |                  | <i>Orobanche cernua</i> var. <i>cumana</i>       | KT387722         |
|          |           |                  | <i>Orobanche densiflora</i>                      | NC_031442        |
|          |           |                  | <i>Orobanche austrohispanica</i>                 | NC_031441        |
|          |           |                  | <i>Orobanche gracillis</i>                       | NC_023464        |

**Table S2.** Blast result of plastid-derived DNA segments in mitochondrial genome of *Aeginetia indica*.

|    | Query start | Query end | Identity (%) | Alignment length | Subject start | Subject end | E value  | Annotation                |
|----|-------------|-----------|--------------|------------------|---------------|-------------|----------|---------------------------|
| 1  | 39,541      | 39,485    | 94.737       | 57               | 30,441        | 30,497      | 2.32E-18 | <i>trnI</i> -CAU          |
| 2  | 39,609      | 39,538    | 98.611       | 72               | 30,369        | 30,440      | 1.63E-30 | <i>rpl2/trnI</i> -CAU IGS |
| 3  | 164,379     | 164,460   | 95.122       | 82               | 38,485        | 38,566      | 1.13E-31 | <i>ndhB</i> *             |
| 4  | 164,458     | 164,611   | 96.104       | 154              | 38,567        | 38,720      | 1.88E-70 | <i>ndhB</i> *             |
| 5  | 164,751     | 164,902   | 92.763       | 152              | 38,821        | 38,972      | 1.87E-59 | <i>ndhB</i> *             |
| 6  | 179,780     | 179,677   | 82.692       | 104              | 13,274        | 13,377      | 1.62E-19 | <i>rps4</i> **            |
| 7  | 179,993     | 179,922   | 91.667       | 72               | 12,422        | 12,493      | 7.82E-22 | <i>trnS</i> -GGA          |
| 8  | 207,951     | 207,868   | 96.429       | 84               | 50,391        | 50,474      | 5.48E-34 | <i>trnN</i> -GUU          |
| 9  | 247,816     | 247,739   | 91.026       | 78               | 15,230        | 15,307      | 1.44E-23 | <i>trnM</i> -CAU          |
| 10 | 265,842     | 265,764   | 92.405       | 79               | 19,037        | 19,115      | 6.95E-26 | <i>trnW</i> -CCA          |
| 11 | 273,732     | 273,793   | 96.774       | 62               | 43,250        | 43,311      | 5.44E-23 | <i>rps7/rrn16</i> IGS     |
| 12 | 393,071     | 392,994   | 92.308       | 78               | 9,450         | 9,527       | 2.63E-25 | <i>trnD</i> -GCU          |

\* indicate pseudogene, \*\* indicate fragments.

**Table S3.** The gene contents of Angiosperm mitogenome including *Aeginetia indica*. ●:present ○: absent

|         | Aeg | Cas | Mim | Sal | Rot | Aju | Hes | Nic | Sol | Rha | Ara | Sil | Gly | Med | Sen | Lac | Vit | Ory | Tri | Lir |
|---------|-----|-----|-----|-----|-----|-----|-----|-----|-----|-----|-----|-----|-----|-----|-----|-----|-----|-----|-----|-----|
| atp1    | ●   | ●   | ●   | ●   | ●   | ●   | ●   | ●   | ●   | ●   | ●   | ●   | ●   | ●   | ●   | ●   | ●   | ●   | ●   | ●   |
| atp4    | ●   | ●   | ●   | ●   | ●   | ●   | ●   | ●   | ●   | ●   | ●   | ●   | ●   | ●   | ●   | ●   | ●   | ○   | ●   | ●   |
| atp6    | ●   | ●   | ●   | ●   | ●   | ●   | ●   | ●   | ●   | ●   | ●   | ●   | ●   | ●   | ●   | ●   | ●   | ●   | ●   | ●   |
| atp8    | ●   | ●   | ●   | ●   | ●   | ●   | ●   | ●   | ●   | ●   | ●   | ●   | ●   | ●   | ●   | ●   | ●   | ○   | ●   | ●   |
| atp9    | ●   | ●   | ●   | ●   | ●   | ●   | ●   | ●   | ●   | ●   | ●   | ●   | ●   | ●   | ●   | ●   | ●   | ●   | ●   | ●   |
| atp1-cp | ●   | ○   | ○   | ○   | ○   | ○   | ○   | ○   | ○   | ○   | ○   | ○   | ○   | ○   | ○   | ○   | ○   | ○   | ○   | ○   |
| ccmB    | ●   | ●   | ●   | ●   | ●   | ●   | ●   | ●   | ●   | ●   | ●   | ●   | ●   | ●   | ●   | ●   | ●   | ●   | ●   | ●   |
| ccmC    | ●   | ●   | ●   | ●   | ●   | ●   | ●   | ●   | ●   | ●   | ●   | ●   | ●   | ●   | ●   | ●   | ●   | ●   | ●   | ●   |
| ccmFc   | ●   | ●   | ●   | ●   | ●   | ●   | ●   | ●   | ●   | ●   | ●   | ●   | ●   | ●   | ●   | ●   | ●   | ●   | ●   | ●   |
| ccmFn   | ●   | ●   | ●   | ●   | ●   | ●   | ●   | ●   | ●   | ●   | ●   | ●   | ●   | ●   | ●   | ●   | ●   | ●   | ●   | ●   |
| cob     | ●   | ●   | ●   | ●   | ●   | ●   | ●   | ●   | ●   | ●   | ●   | ●   | ●   | ●   | ●   | ●   | ●   | ●   | ●   | ●   |
| cox1    | ●   | ●   | ●   | ●   | ●   | ●   | ●   | ●   | ●   | ●   | ●   | ●   | ●   | ●   | ●   | ●   | ●   | ●   | ●   | ●   |
| cox2    | ●   | ●   | ●   | ●   | ●   | ●   | ●   | ●   | ●   | ●   | ●   | ●   | ●   | ○   | ●   | ●   | ●   | ●   | ●   | ●   |
| cox3    | ●   | ●   | ●   | ●   | ●   | ●   | ●   | ●   | ●   | ●   | ●   | ●   | ●   | ●   | ●   | ●   | ●   | ●   | ●   | ●   |
| matR    | ●   | ●   | ●   | ●   | ●   | ●   | ●   | ●   | ●   | ●   | ●   | ●   | ●   | ●   | ●   | ●   | ●   | ●   | ●   | ●   |
| mttB    | ●   | ●   | ●   | ●   | ●   | ●   | ●   | ●   | ●   | ●   | ●   | ●   | ●   | ●   | ●   | ●   | ●   | ○   | ●   | ●   |
| nad1    | ●   | ●   | ●   | ●   | ●   | ●   | ●   | ●   | ●   | ●   | ●   | ●   | ●   | ●   | ●   | ●   | ●   | ●   | ●   | ●   |
| nad2    | ●   | ●   | ●   | ●   | ●   | ●   | ●   | ●   | ●   | ●   | ●   | ●   | ●   | ●   | ●   | ●   | ●   | ●   | ●   | ●   |
| nad3    | ●   | ●   | ●   | ●   | ●   | ●   | ●   | ●   | ●   | ●   | ●   | ●   | ●   | ●   | ●   | ●   | ●   | ●   | ●   | ●   |
| nad4    | ●   | ●   | ●   | ●   | ●   | ●   | ●   | ●   | ●   | ●   | ●   | ●   | ●   | ●   | ●   | ●   | ●   | ●   | ●   | ●   |
| nad4L   | ●   | ●   | ●   | ●   | ●   | ●   | ●   | ●   | ●   | ●   | ●   | ●   | ●   | ●   | ●   | ●   | ●   | ●   | ●   | ●   |
| nad5    | ●   | ●   | ●   | ●   | ●   | ●   | ●   | ●   | ●   | ●   | ●   | ●   | ●   | ●   | ●   | ●   | ●   | ●   | ●   | ●   |
| nad6    | ●   | ●   | ●   | ●   | ●   | ●   | ●   | ●   | ●   | ●   | ●   | ●   | ●   | ●   | ●   | ●   | ●   | ●   | ●   | ●   |
| nad7    | ●   | ●   | ●   | ●   | ●   | ●   | ●   | ●   | ●   | ●   | ●   | ●   | ●   | ●   | ●   | ●   | ●   | ●   | ●   | ●   |
| nad9    | ●   | ●   | ●   | ●   | ●   | ●   | ●   | ●   | ●   | ●   | ●   | ●   | ●   | ●   | ●   | ●   | ●   | ●   | ●   | ●   |
| rpl2    | ●   | ○   | ○   | ●   | ●   | ●   | ●   | ●   | ●   | ●   | ●   | ●   | ○   | ○   | ○   | ○   | ●   | ●   | ○   | ●   |
| rpl5    | ●   | ●   | ●   | ●   | ●   | ○   | ●   | ○   | ●   | ●   | ●   | ●   | ●   | ●   | ●   | ●   | ●   | ●   | ●   | ●   |
| rpl10   | ●   | ●   | ●   | ●   | ●   | ○   | ●   | ●   | ●   | ●   | ○   | ○   | ○   | ○   | ○   | ●   | ○   | ○   | ○   | ●   |
| rpl16   | ●   | ●   | ●   | ●   | ●   | ○   | ●   | ●   | ●   | ●   | ●   | ○   | ●   | ●   | ●   | ●   | ●   | ○   | ●   | ●   |
| rps1    | ○   | ○   | ○   | ○   | ○   | ○   | ○   | ●   | ●   | ●   | ○   | ○   | ●   | ●   | ●   | ○   | ●   | ●   | ●   | ●   |
| rps2    | ○   | ○   | ○   | ○   | ○   | ○   | ○   | ○   | ○   | ○   | ○   | ○   | ○   | ○   | ○   | ○   | ○   | ●   | ●   | ●   |
| rps3    | ●   | ●   | ●   | ●   | ●   | ●   | ●   | ○   | ●   | ●   | ●   | ●   | ●   | ●   | ●   | ●   | ●   | ●   | ●   | ●   |
| rps4    | ●   | ●   | ●   | ●   | ●   | ●   | ●   | ○   | ●   | ●   | ●   | ●   | ●   | ●   | ●   | ●   | ●   | ●   | ●   | ●   |
| rps7    | ○   | ○   | ○   | ●   | ○   | ○   | ●   | ○   | ○   | ●   | ●   | ○   | ○   | ○   | ○   | ○   | ●   | ●   | ●   | ●   |
| rps10   | ●   | ●   | ●   | ●   | ●   | ○   | ●   | ●   | ●   | ●   | ○   | ○   | ●   | ●   | ●   | ○   | ●   | ○   | ○   | ●   |
| rps11   | ○   | ○   | ○   | ○   | ○   | ○   | ○   | ○   | ○   | ○   | ○   | ○   | ○   | ○   | ○   | ○   | ●   | ○   | ○   | ●   |
| rps12   | ●   | ●   | ●   | ●   | ●   | ●   | ●   | ○   | ●   | ●   | ●   | ○   | ●   | ●   | ●   | ●   | ●   | ●   | ●   | ●   |
| rps13   | ●   | ●   | ●   | ●   | ●   | ●   | ●   | ●   | ●   | ●   | ○   | ○   | ○   | ○   | ○   | ●   | ●   | ●   | ○   | ●   |
| rps14   | ●   | ●   | ●   | ●   | ●   | ○   | ●   | ●   | ○   | ●   | ○   | ●   | ●   | ●   | ●   | ○   | ●   | ○   | ○   | ●   |

|       |   |   |   |   |   |   |   |   |   |   |   |   |   |   |   |   |   |   |   |   |   |
|-------|---|---|---|---|---|---|---|---|---|---|---|---|---|---|---|---|---|---|---|---|---|
| rps19 | ○ | ○ | ○ | ○ | ○ | ○ | ○ | ● | ● | ● | ○ | ○ | ○ | ○ | ○ | ○ | ○ | ● | ● | ● | ● |
| sdh3  | ○ | ● | ● | ○ | ○ | ○ | ● | ● | ● | ○ | ○ | ○ | ○ | ○ | ○ | ○ | ○ | ● | ○ | ○ | ● |
| sdh4  | ψ | ○ | ● | ○ | ○ | ○ | ● | ● | ● | ● | ○ | ○ | ○ | ○ | ○ | ○ | ○ | ● | ○ | ○ | ● |

Aeg=*Aeginetia indica*; Cas=*Castilleja paramensis*; Mim=*Mimulus guttatus*; Sal=*Salvia miltiorrhiza*; Rot=*Rothea serrata*; Aju= *Ajuga reptans*; Hes=*Hesperelaea palmeri*; Nic=*Nicotiana tabacum*; Sol=*Solanum pennellii*; Rha=*Rhazya stricta*; Ara= *Arabidopsis thaliana*; Sil=*Silene latifolia*; Gly=*Glycine max*; Med=*Medicago truncatula*; Sen=*Senna tora*; Lac=*Lactuca sativa*; Vit= *Vitis vinifera*; Ory=*Oryza sativa*; Tri=*Triticum aestivum*; Lir=*Liriodendron tulipifera*



|             |   |    |   |   |   |   |   |   |   |   |      |   |   |   |      |      |      |   |   |   |
|-------------|---|----|---|---|---|---|---|---|---|---|------|---|---|---|------|------|------|---|---|---|
| trnS-GCU    | ● | ●- | ● | ● | ● | ● | ● | ● | ● | ● | ●    | ○ | ● | ○ | ●(2) | ●(3) | ●    | ○ | ○ | ● |
| trnS-GGA    | ● | ●  | ● | ● | ○ | ○ | ● | ● | ● | ● | ●    | ○ | ○ | ○ | ○    | ○    | ●    | ● | ● | ○ |
| trnS-UGA    | ○ | ○  | ○ | ● | ○ | ● | ● | ● | ● | ● | ●    | ○ | ○ | ○ | ○    | ●    | ●    | ○ | ○ | ● |
| trnT-CCA-CP | ○ | ○  | ○ | ○ | ○ | ○ | ○ | ○ | ○ | ○ | ○    | ○ | ○ | ○ | ○    | ○    | ●(2) | ○ | ○ | ○ |
| trnT-GGU    | ○ | ●  | ● | ○ | ○ | ○ | ○ | ○ | ○ | ○ | ○    | ○ | ○ | ○ | ○    | ○    | ●    | ● | ○ | ○ |
| trnT-GUA-CP | ○ | ○  | ○ | ○ | ○ | ○ | ○ | ○ | ○ | ○ | ○    | ○ | ○ | ○ | ○    | ○    | ○    | ○ | ○ | ○ |
| trnT-GUA    | ○ | ○  | ○ | ○ | ○ | ○ | ○ | ○ | ○ | ○ | ○    | ○ | ○ | ○ | ○    | ○    | ○    | ○ | ○ | ○ |
| trnT-TGT    | ○ | ○  | ○ | ○ | ○ | ○ | ○ | ○ | ○ | ○ | ○    | ○ | ○ | ○ | ○    | ○    | ○    | ○ | ○ | ○ |
| trnV-GAC-CP | ○ | ○  | ○ | ● | ○ | ○ | ○ | ○ | ○ | ○ | ●    | ○ | ○ | ○ | ○    | ●    | ○    | ○ | ○ | ○ |
| trnV-TAC    | ○ | ○  | ○ | ○ | ○ | ○ | ○ | ○ | ○ | ○ | ○    | ○ | ○ | ○ | ○    | ○    | ○    | ○ | ○ | ● |
| trnW-CCA-CP | ● | ●  | ● | ● | ● | ● | ● | ● | ● | ● | ●    | ● | ● | ● | ●    | ●    | ○    | ● | ● | ● |
| trnY-GUA    | ● | ●  | ● | ● | ● | ● | ● | ● | ● | ● | ●(2) | ● | ● | ● | ●    | ●    | ○    | ● | ● | ● |

Aeg=Aeginetia indica; Cas=Castilleja paramensis; Mim=Mimulus guttatus; Sal=Salvia miltiorrhiza; Rot=Rothea serrata; Aju= Ajuga reptans; Hes=Hesperelaea palmeri; Nic=Nicotiana tabacum; Sol=Solanum pennellii; Rha=Rhazya stricta; Ara= Arabidopsis thaliana; Sil=Silene latifolia; Gly=Glycine max; Med=Medicago truncatula; Sen=Senna tora; Lac=Lactuca sativa; Vit= Vitis vinifera; Ory=Oryza sativa; Tri=Triticum aestivum; Lir=Liriodendron tulipifera

**Table S5.** The intron contents of Angiosperm mitogenome including *Aeginetia indica*. ●:present ○: absent, x: gene loss

|            | Aeg | Cas | Mim | Sal | Rot | Aju | Hes | Nic | Sol | Rha | Ara | Sil | Gly | Med | Sen | Lac | Vit | Ory | Tri | Lir |
|------------|-----|-----|-----|-----|-----|-----|-----|-----|-----|-----|-----|-----|-----|-----|-----|-----|-----|-----|-----|-----|
| nad1-i394  | ●   | ●   | ●   | ●   | ●   | ●   | ●   | ●   | ●   | ●   | ●   | ●   | ●   | ●   | ●   | ●   | ●   | ●   | ●   | ●   |
| nad1-i477  | ●   | ●   | ●   | ●   | ●   | ●   | ●   | ●   | ●   | ●   | ●   | ●   | ●   | ●   | ●   | ●   | ●   | ●   | ●   | ●   |
| nad1-i669  | ●   | ●   | ●   | ○   | ●   | ●   | ●   | ●   | ●   | ●   | ●   | ●   | ●   | ●   | ●   | ●   | ●   | ●   | ●   | ●   |
| nad1-i728  | ●   | ●   | ●   | ●   | ●   | ●   | ●   | ●   | ●   | ●   | ●   | ●   | ●   | ●   | ●   | ●   | ●   | ●   | ●   | ●   |
| nad2-i156  | ●   | ●   | ●   | ●   | ●   | ●   | ●   | ●   | ●   | ●   | ●   | ●   | ●   | ●   | ●   | ●   | ●   | ●   | ●   | ●   |
| nad2-i542  | ●   | ●   | ●   | ●   | ●   | ●   | ●   | ●   | ●   | ●   | ●   | ●   | ●   | ●   | ●   | ●   | ●   | ●   | ●   | ●   |
| nad2-i709  | ●   | ●   | ●   | ●   | ●   | ●   | ●   | ●   | ●   | ●   | ●   | ●   | ●   | ●   | ●   | ●   | ●   | ●   | ●   | ●   |
| nad2-i1282 | ●   | ●   | ●   | ●   | ●   | ●   | ●   | ●   | ●   | ●   | ●   | ●   | ●   | ●   | ●   | ●   | ●   | ●   | ●   | ●   |
| nad4-i461  | ●   | ●   | ●   | ●   | ●   | ●   | ●   | ●   | ●   | ●   | ●   | ●   | ●   | ●   | ●   | ●   | ●   | ●   | ●   | ●   |
| nad4-i976  | ●   | ●   | ●   | ●   | ●   | ●   | ●   | ●   | ●   | ●   | ●   | ○   | ●   | ●   | ●   | ●   | ●   | ●   | ●   | ●   |
| nad4-i1399 | ●   | ●   | ●   | ●   | ●   | ●   | ●   | ●   | ●   | ●   | ●   | ●   | ●   | ●   | ●   | ●   | ●   | ●   | ●   | ●   |
| nad5-i230  | ●   | ●   | ●   | ●   | ●   | ●   | ●   | ●   | ●   | ●   | ●   | ●   | ●   | ●   | ●   | ●   | ●   | ●   | ●   | ●   |
| nad5-i1455 | ●   | ●   | ●   | ●   | ●   | ●   | ●   | ●   | ●   | ●   | ●   | ●   | ●   | ●   | ●   | ●   | ●   | ●   | ●   | ●   |
| nad5-i1477 | ●   | ●   | ●   | ●   | ●   | ●   | ●   | ●   | ●   | ●   | ●   | ●   | ●   | ●   | ●   | ●   | ●   | ●   | ●   | ●   |
| nad5-i1872 | ●   | ●   | ●   | ●   | ●   | ●   | ●   | ●   | ●   | ●   | ●   | ●   | ●   | ●   | ●   | ●   | ●   | ●   | ●   | ●   |
| nad7-i140  | ●   | ●   | ●   | ●   | ●   | ●   | ●   | ●   | ●   | ●   | ●   | ●   | ●   | ●   | ●   | ●   | ●   | ●   | ●   | ●   |
| nad7-i209  | ●   | ●   | ●   | ●   | ●   | ●   | ●   | ●   | ●   | ●   | ●   | ●   | ●   | ●   | ●   | ●   | ●   | ●   | ●   | ●   |
| nad7-i676  | ○   | ○   | ○   | ○   | ○   | ○   | ○   | ○   | ○   | ○   | ●   | ●   | ●   | ●   | ●   | ●   | ●   | ●   | ●   | ●   |
| nad7-i917  | ●   | ●   | ●   | ●   | ●   | ●   | ●   | ●   | ●   | ●   | ●   | ●   | ●   | ●   | ●   | ●   | ●   | ●   | ●   | ●   |
| ccmFc-i829 | ●   | ●   | ●   | ●   | ●   | ●   | ●   | ●   | ●   | ●   | ●   | ●   | ●   | ●   | ●   | ●   | ●   | ●   | ●   | ●   |
| cox1-i729  | ●   | ●   | ○   | ●   | ●   | ●   | ○   | ○   | ○   | ●   | ○   | ○   | ○   | ○   | ○   | ○   | ○   | ○   | ○   | ○   |
| cox2-i373  | ○   | ○   | ○   | ○   | ○   | ○   | ○   | ○   | ●   | ○   | ○   | ○   | ○   | ○   | ○   | ○   | ●   | ●   | ●   | ●   |
| cox2-i691  | ●   | ●   | ●   | ●   | ○   | ○   | ●   | ●   | ●   | ●   | ●   | ○   | ○   | ○   | ○   | ○   | ●   | ○   | ○   | ●   |
| rpl2-i917  | ○   | X   | X   | ●   | ○   | ○   | ○   | ●   | ●   | ●   | ●   | X   | X   | X   | X   | X   | ●   | ●   | X   | ●   |
| rps3-i74   | ●   | ●   | ●   | ●   | ●   | ○   | ●   | ●   | X   | ●   | ●   | ○   | ●   | ●   | ●   | ●   | ●   | ●   | ●   | ●   |
| rps10-i235 | ○   | ●   | ●   | ●   | ●   | X   | ●   | ●   | x   | ●   | X   | X   | ●   | ●   | ●   | ●   | ●   | X   | X   | ●   |

Aeg=*Aeginetia indica*; Cas=*Castilleja paramensis*; Mim=*Mimulus guttatus*; Sal=*Salvia miltiorrhiza*; Rot=*Rothea serrata*; Aju= *Ajuga reptans*; Hes=*Hesperelaea palmeri*; Nic=*Nicotiana tabacum*; Sol=*Solanum pennellii*; Rha=*Rhazya stricta*; Ara= *Arabidopsis thaliana*; Sil=*Silene latifolia*; Gly=*Glycine max*; Med=*Medicago truncatula*; Sen=*Senna tora*; Lac=*Lactuca sativa*; Vit= *Vitis vinifera*; Ory=*Oryza sativa*; Tri=*Triticum aestivum*; Lir=*Liriodendron tulipifera*

**Table S6.** Source for mitochondrial genomes included this study.

| Class         | Order          | Family        | Species                        | Accession number |
|---------------|----------------|---------------|--------------------------------|------------------|
| Magnoliopsida | Magnoliales    | Magnoliaceae  | <i>Liriodendron tulipifera</i> | NC_021152        |
| Liliopsida    | Poales         | Poaceae       | <i>Triticum aestivum</i>       | NC_036024        |
|               |                |               | <i>Oryza sativa</i>            | NC_011033        |
| Rosids        | Vitales        | Vitaceae      | <i>Vitis vinifera</i>          | NC_012119        |
|               | Fabiales       | Fabaceae      | <i>Senna tora</i>              | NC_038053        |
|               |                |               | <i>Medicago truncatula</i>     | NC_029641        |
|               |                |               | <i>Glycine max</i>             | NC_020455        |
| Pentapetalae  | Caryophyllales | Sileneae      | <i>Silene latifolia</i>        | NC_014487        |
| Rosids        | Brassicales    | Brassicaceae  | <i>Arabidopsis thaliana</i>    | NC_037304        |
| Asterids      | Asterales      | Asteraceae    | <i>Lactuca sativa</i>          | NC_042756        |
|               | Gentianales    | Apocynaceae   | <i>Rhazya stricta</i>          | NC_024293        |
|               | Solanales      | Solanaceae    | <i>Nicotiana tabacum</i>       | NC_006581        |
|               |                |               | <i>Solanum pennellii</i>       | NC_-35964        |
|               | Lamiales       | Oleaceae      | <i>Hesperelaea paleri</i>      | NC_031323        |
|               |                | Lamiaceae     | <i>Salvia miltiorrhiza</i>     | NC_023209        |
|               |                |               | <i>Ajuga reptans</i>           | NC_023103        |
|               |                |               | <i>Rothea serrata</i>          | NC_049064        |
|               |                | Phrymaceae    | <i>Mimulus guttatus</i>        | NC_018041        |
|               |                | Orobanchaceae | <i>Castilleja paramensis</i>   | NC_031806        |
|               |                |               | <i>Aeginetia indica</i>        | <b>MW851294</b>  |



**Table S7.** Taxon accession numbers for phylogenetic analysis of IGT and HGT.

| Species        |                                            | Accession number |             |             |             |
|----------------|--------------------------------------------|------------------|-------------|-------------|-------------|
|                |                                            | <i>cemA</i>      | <i>ndhB</i> | <i>atpH</i> | <i>atpI</i> |
| Amborellaceae  | <i>Amborella trichopoda</i>                |                  | KF754803    |             |             |
|                |                                            | o                | o           | o           | o           |
| Nymphaeaceae   | <i>Nymphaea lotus</i>                      |                  | NC_041238   |             |             |
|                |                                            | o                | o           | o           | o           |
| Magnoliaceae   | <i>Liriodendron chinense</i>               |                  | NC_030504   |             |             |
|                |                                            | o                | o           | o           | o           |
| Araceae        | <i>Spirodela polyrhiza</i>                 |                  | NC_015891   |             |             |
|                |                                            | o                | o           | o           | o           |
| Poaceae        | <i>Elymandra subulata</i>                  |                  | MH181214    |             |             |
|                |                                            | o                | o           | o           | o           |
| Poaceae        | <i>Miscanthus sinensis subsp. sinensis</i> |                  | LN869228    |             |             |
|                |                                            | o                | o           | o           | o           |
| Cephalotaceae  | <i>Cephalotus follicularis</i>             |                  | NC_042597   |             |             |
|                |                                            | o                | x           | o           | o           |
| Aquifoliaceae  | <i>Ilex paraguariensis</i>                 |                  | NC_031207   |             |             |
|                |                                            | o                | o           | o           | o           |
| Aquifoliaceae  | <i>Ilex latifolia</i>                      |                  | NC_047291   |             |             |
|                |                                            | o                | o           | o           | o           |
| Caprifoliaceae | <i>Heptacodium miconioides</i>             |                  | NC_042739   |             |             |
|                |                                            | o                | o           | o           | o           |
| Caprifoliaceae | <i>Zabelia biflora</i>                     |                  | NC_045063   |             |             |
|                |                                            | o                | o           | o           | o           |
| Caprifoliaceae | <i>Zabelia triflora</i>                    |                  | NC_045053   |             |             |
|                |                                            | o                | o           | o           | o           |
| Oleaceae       | <i>Fraxinus latifolia</i>                  |                  | NC_042450   |             |             |
|                |                                            | o                | o           | o           | o           |
| Plantaginaceae | <i>Triaenophora shennongjiaensis</i>       |                  | NC_039781   |             |             |
|                |                                            | o                | o           | o           | o           |
| Orobanchaceae  | <i>Rehmannia solanifolia</i>               |                  | NC_034310   |             |             |
|                |                                            | o                | o           | o           | o           |
| Orobanchaceae  | <i>Rehmannia glutinosa</i>                 |                  | NC_034308   |             |             |
|                |                                            | o                | o           | o           | o           |
| Orobanchaceae  | <i>Rehmannia chingii</i>                   |                  | NC_033534   |             |             |
|                |                                            | o                | o           | o           | o           |
| Orobanchaceae  | <i>Rehmannia henryi</i>                    |                  | NC_034309   |             |             |
|                |                                            | o                | o           | o           | o           |
| Orobanchaceae  | <i>Rehmannia elata</i>                     |                  | NC_034312   |             |             |
|                |                                            | o                | o           | o           | o           |
| Orobanchaceae  | <i>Rehmannia piasezkii</i>                 |                  | NC_034311   |             |             |
|                |                                            | o                | o           | o           | o           |
| Orobanchaceae  | <i>Siphonostegia chinensis</i>             |                  | NC_046038   |             |             |
|                |                                            | o                | o           | o           | o           |
| Orobanchaceae  | <i>Schwalbea americana</i>                 |                  | NC_023115   |             |             |
|                |                                            | o                | o           | o           | o           |
| Orobanchaceae  | <i>Brandisia swinglei</i>                  |                  | NC_042954   |             |             |
|                |                                            | o                | o           | o           | o           |
| Orobanchaceae  | <i>Lathraea squamaria</i>                  |                  | NC_027838   |             |             |
|                |                                            | x                | x           | o           | o           |
| Orobanchaceae  | <i>Euphrasia regelii</i>                   |                  | NC_045041   |             |             |
|                |                                            | x                | x           | o           | o           |
| Orobanchaceae  | <i>Melampyrum roseum</i>                   |                  | MN075942    |             |             |
|                |                                            | o                | o           | o           | o           |
| Orobanchaceae  | <i>Lindenbergia philippensis</i>           |                  | NC_022859   |             |             |
|                |                                            | o                | o           | o           | o           |

|               |                               |           |   |   |   |
|---------------|-------------------------------|-----------|---|---|---|
| Orobanchaceae | <i>Orobanche californica</i>  | NC_025651 |   |   |   |
|               |                               | x         | x | x | o |
| Orobanchaceae | <i>Phelipanche purpurea</i>   | NC_023132 |   |   |   |
|               |                               | x         | x | o | o |
| Orobanchaceae | <i>Phelipanche aegyptiaca</i> | KU21370   |   |   |   |
|               |                               | x         | x | o | o |
| Orobanchaceae | <i>Phelipanche ramosa</i>     | NC_023465 |   |   |   |
|               |                               | x         | x | o | o |

The present of the each gene in each plastid genome is indicated with an “o”

The absence of the each gene in each plastid genome is indicated with an “x”

**Table S8.** Candidate CMS genes in *A. indica* mitochondrial genome.

|        | ORF<br>start | ORF<br>end | ORF<br>length | Identity | ORF<br>hit<br>start | ORF<br>hit<br>end | Chimera<br>length | Gene<br>hit start | Gene<br>hit end | E-value   | Gene         | No of<br>Transmembra<br>ne helices /<br>probabilities |
|--------|--------------|------------|---------------|----------|---------------------|-------------------|-------------------|-------------------|-----------------|-----------|--------------|-------------------------------------------------------|
| ORF525 | 358,448      | 358,266    | 183           | 96.774   | 151                 | 181               | 31                | 1,554             | 1,584           | 1.08e-08  | <i>rps3</i>  | 0/0.67375                                             |
| ORF709 | 204,364      | 204,095    | 270           | 95.349   | 133                 | 175               | 43                | 868               | 910             | 4.52e-14  | <i>atp6</i>  | 2/0.41976                                             |
| ORF103 | 289,222      | 289,401    | 180           | 95       | 126                 | 87                | 40                | 538               | 577             | 3.81e-12  | <i>ccmFn</i> | 0/0.39590                                             |
| ORF403 | 347,931      | 347,707    | 225           | 96.667   | 111                 | 82                | 30                | 548               | 577             | 4.30e-08  | <i>ccmFn</i> | 0/0.34781                                             |
| ORF99  | 282,157      | 282,414    | 258           | 92.308   | 48                  | 10                | 39                | 588               | 626             | 7.22e-10  | <i>cox1</i>  | 0/0.22222                                             |
| ORF724 | 137,638      | 137,480    | 159           | 94.286   | 106                 | 72                | 35                | 151               | 185             | 2.74e-09  | <i>cox1</i>  | 0/0.47309                                             |
| ORF43  | 338,288      | 339,217    | 930           | 100      | 1                   | 298               | 298               | 1                 | 298             | 2.71e-165 | <i>cox2</i>  | 2/0.00547                                             |
